# Supplementary material for: HGD-derived N-formylkynurenine promotes small cell lung cancer chemoresistance by activating ATL2-mediated endoplasmic reticulum remodelling.
Source: Research Square preprint supplement (doi:10.21203/rs.3.rs-8510398/v1), 2026-01-22
Supplement: Supplementary file 1 [file 549a17009065ec7eb04434a2.pdf]

**Supplementary Material**

**HGD-derived *N*-formylkynurenine promotes small cell lung cancer chemoresistance by activating ATL2-mediated endoplasmic reticulum remodelling**

Ruibin Yi<sup>1,#</sup>, Yueming Zhang<sup>1,#</sup>, Jiayi Cai<sup>1</sup>, Qingxi Zhang<sup>2</sup>, Haoxuan Ying<sup>1</sup>, Ting Wei<sup>1,\*</sup>, Jian Zhang<sup>1,\*</sup>, Weitao Shen<sup>1,\*</sup>

**Affiliations**

<sup>1</sup> Department of Oncology, Zhujiang Hospital, Southern Medical University, Guangzhou, Guangdong, 510280, China.

<sup>2</sup> Department of Rehabilitation Medicine, The Second Affiliated Hospital, Guangzhou Medical University, Guangzhou, China.

\* Correspondence: Weitao Shen, M.D., Ph.D., Department of Oncology, Zhujiang Hospital, Southern Medical University. Email: shenweitao1@i.smu.edu.cn

Jian Zhang, M.D., Ph.D., email: zhangjian@i.smu.edu.cn

Ting Wei, M.D., Ph.D., email: weitingyouyou@qq.com

# Contributed equally.

## Extended Data Fig. 1

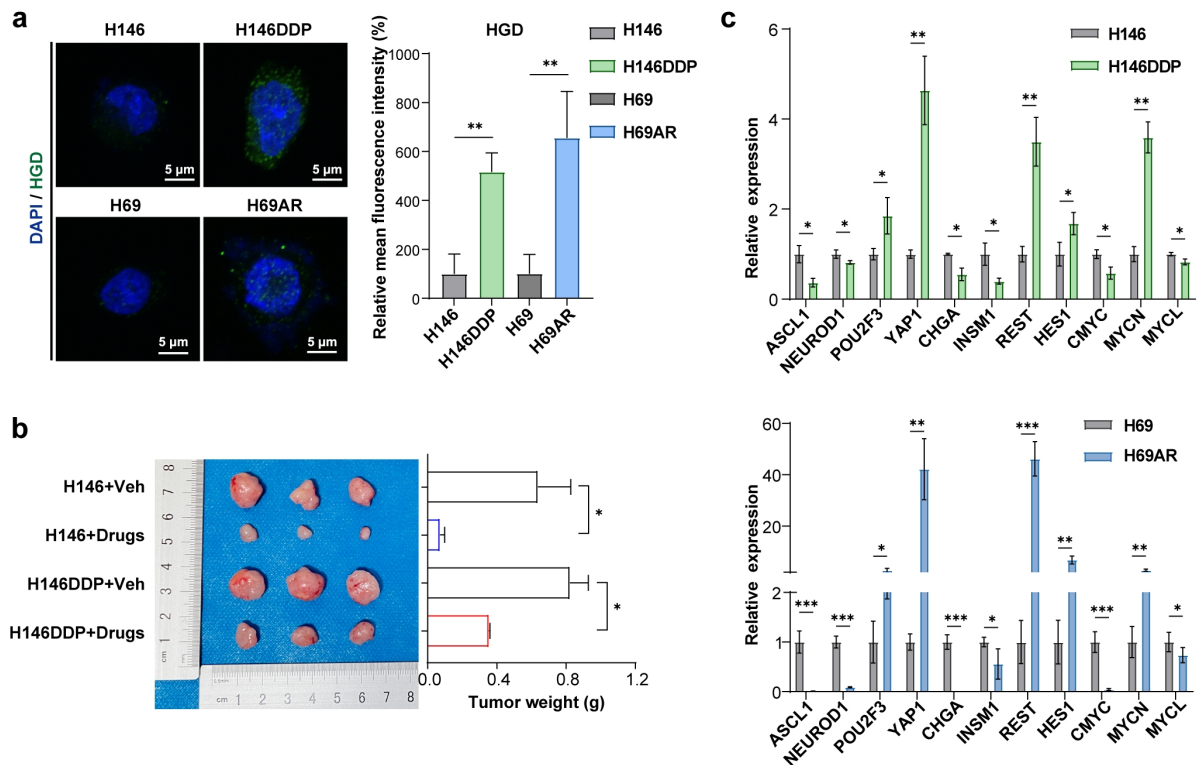

### Extended Data Fig. 1, related to Fig. 1.

**a**, Immunofluorescence staining of HGD (green) and nuclei (DAPI, blue) in parental and chemoresistant SCLC cell lines, with quantification (right) showing higher cytoplasmic HGD fluorescence in chemoresistant cells. Scale bars, 5  $\mu$ m. Representative images of  $n = 3$  biological replicates. **b**, Representative images of xenograft tumours and the corresponding tumour burdens derived from parental H146 and chemoresistant H146DDP cells treated with vehicle (Veh) or cisplatin plus etoposide (Drugs).  $n = 3$ . **c**, Relative mRNA expression of neuroendocrine (NE) markers in parental (H146 and H69) and chemoresistant (H146DDP and H69AR) SCLC cells. Chemoresistant cells exhibit increased expression of non-NE markers (YAP1, REST, and HES1) and reduced expression of NE markers (ASCL1, NEUROD1, CHGA, and INSM1).  $n = 3$ .

Data are presented as the mean  $\pm$  s.d. Statistical analysis was performed using two-tailed unpaired Student's  $t$  test (**a**, **c**), or unpaired  $t$  test with Welch's correction (**b**). \* $P < 0.05$ , \*\* $P < 0.01$ , \*\*\* $P < 0.001$ , \*\*\*\* $P < 0.0001$ .

## Extended Data Fig. 2

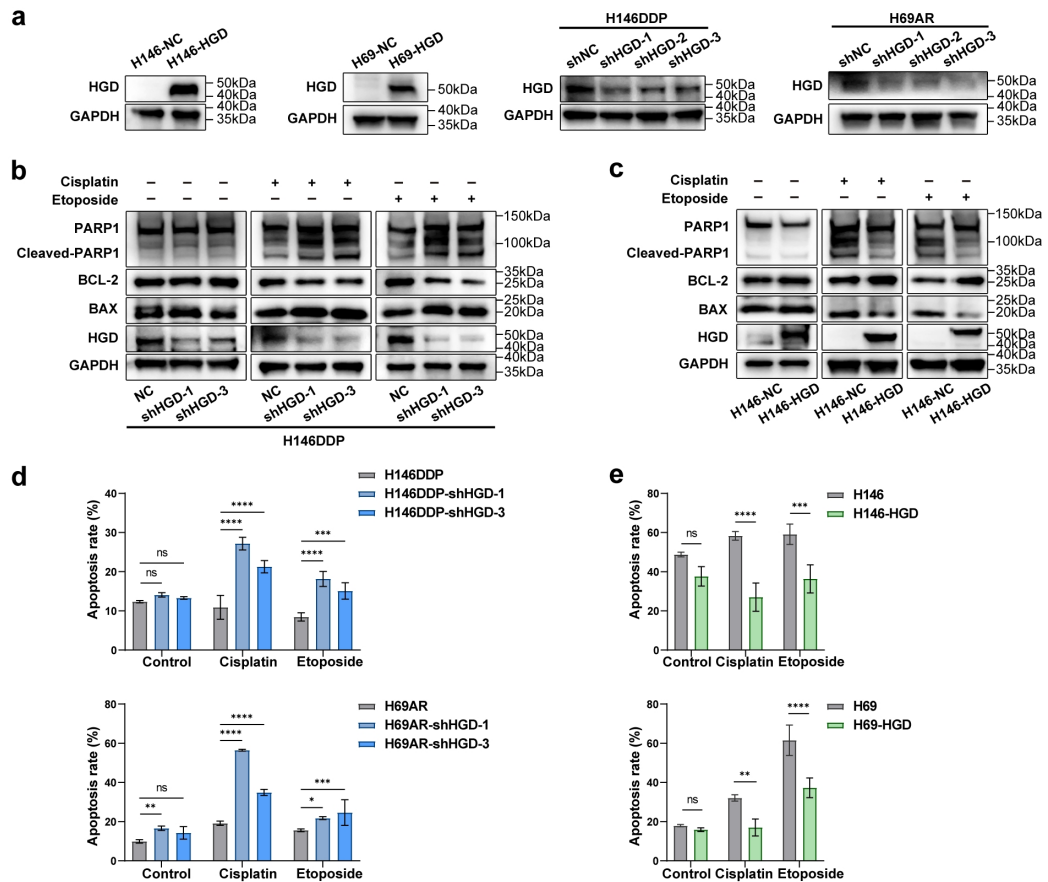

### Extended Data Fig. 2, related to Fig. 2.

**a**, Immunoblot analysis confirming HGD overexpression in H146 and H69 cells and HGD knockdown in H146DDP and H69AR cells. Representative images of  $n = 3$  biological replicates. **b**, **c**, Immunoblot analysis of PARP1, cleaved PARP1, BCL-2, and BAX expression in H146DDP cells with NC or HGD knockdown (**b**) and in H146 cells with NC or HGD overexpression (**c**) following treatment with cisplatin or etoposide. Representative images of  $n = 3$  biological replicates. **d**, **e**, Quantification of apoptosis by flow cytometry in H146DDP and H69AR cells with or without HGD knockdown (**d**) and in H146 and H69 cells with NC with or without HGD overexpression (**e**) following treatment with cisplatin or etoposide.  $n = 3$ .

The data are presented as mean  $\pm$  SD. Statistical analysis was performed using two-way ANOVA with Sidak's multiple-comparison test (**d**, **e**). ns, not significant; \* $P < 0.05$ , \*\* $P < 0.01$ , \*\*\* $P < 0.001$ , \*\*\*\* $P < 0.0001$ .

# Extended Data Fig. 3

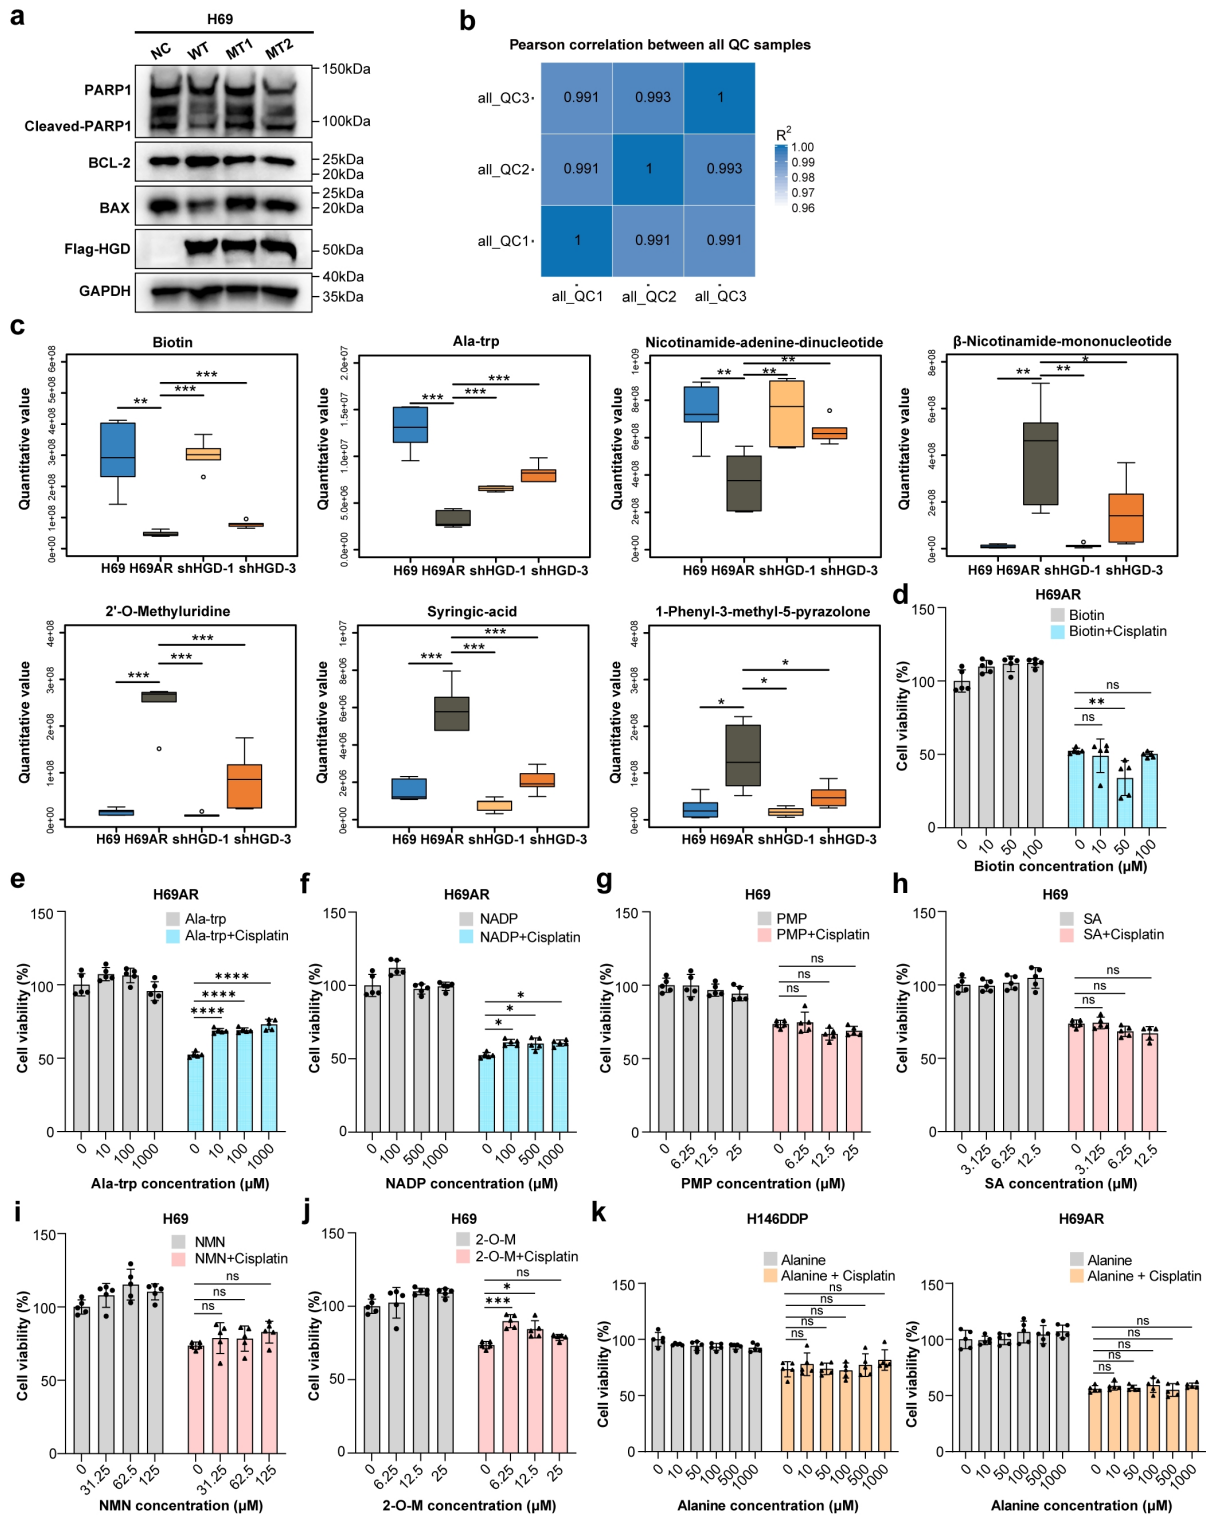

48 **Extended Data Fig. 3, related to Fig. 3.**

49 **a**, Immunoblot analysis of PARP1, cleaved PARP1, BCL-2, BAX, and Flag-HGD

50 expression in H69 cells expressing control vector (NC), wild-type HGD (WT), or



51 catalytically impaired mutants (MT1, R225H; or MT2, I216T) following cisplatin treatment.  
52 Representative images of  $n = 3$  biological replicates. **b**, Pearson correlation matrix of  
53 quality control (QC) samples from the untargeted metabolomics dataset.  $n = 6$ . **c**,  
54 Quantification of selected metabolites identified in **Fig. 3 (e)**, including biotin, nicotinamide  
55 adenine dinucleotide (NADP),  $\beta$ -nicotinamide mononucleotide (NMN), 2'-O-methyluridine,  
56 syringic acid, and 1-phenyl-3-methyl-5-pyrazolone (PMP), in H69, H69AR, and H69AR  
57 cells with HGD knockdown.  $n = 6$ .  
58 **d–f**, Viability of H69AR cells treated with increasing concentrations of biotin (**d**), Ala-Trp (**e**)  
59 or NADP (**f**) with or without cisplatin.  $n = 5$ . The 0  $\mu\text{M}$  conditions (with or without cisplatin)  
60 represent untreated baseline controls measured once within the same experimental run;  
61 hence, the same control values are shared across panels (**d–f**) to ensure internal  
62 consistency. **g–j**, Viability of H69 cells treated with PMP (**g**), syringic acid (**h**), NMN (**i**) or  
63 2-O-M (**j**) with or without cisplatin.  $n = 5$ . The 0  $\mu\text{M}$  groups (with or without cisplatin)  
64 correspond to common baseline controls acquired in the same experiment and are  
65 therefore shared across panels (**g–j**). **k**, Viability of H146DDP and H69AR cells treated  
66 with alanine with or without cisplatin.  $n = 5$ .  
67 Data are presented as the mean  $\pm$  s.d. Statistical analysis was performed using two-tailed  
68 unpaired Student's  $t$  test (**c**) or two-way ANOVA with Sidak's multiple-comparison test  
69 (**d–k**). ns, not significant;  $*P < 0.05$ ,  $**P < 0.01$ ,  $***P < 0.001$ ,  $****P < 0.0001$ .

## Extended Data Fig. 4

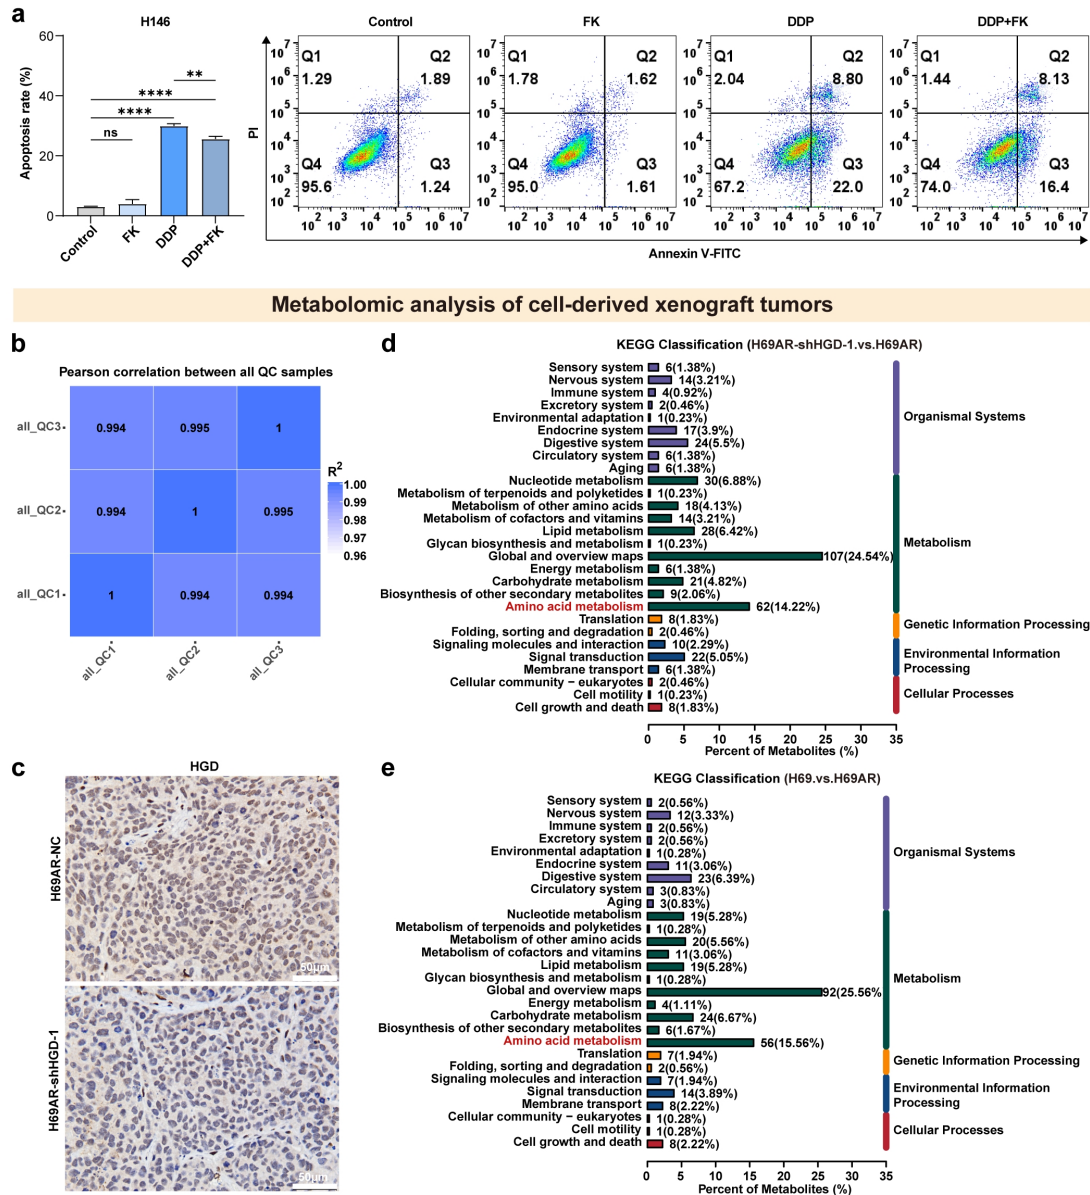

### Extended Data Fig. 4, related to Fig. 4.

**a**, Flow cytometry analysis and quantification of apoptosis in H146 cells treated with *N*-formylkynurenine (FK), cisplatin (DDP), or their combination.  $n = 3$ . Data are presented as the mean  $\pm$  s.d. Statistical analysis was performed using one-way ANOVA with Sidak's multiple-comparison test. ns, not significant,  $**P < 0.01$ ,  $****P < 0.0001$ . **b**, Pearson correlation matrix of quality-control (QC) samples from the untargeted metabolomic profiling of xenograft tumours.  $n = 6$ . **c**, Representative immunohistochemistry images of HGD in xenograft tumours derived from H69AR-NC and H69AR-shHGD-1 cells. Scale

78 bars, 50  $\mu$ m. **d**, **e**, KEGG functional classification of differentially abundant metabolites in  
79 H69AR-shHGD-1 versus H69AR-NC xenograft tumours (**d**) and H69 versus H69AR  
80 xenograft tumours (**e**). n = 6.

## Extended Data Fig. 5

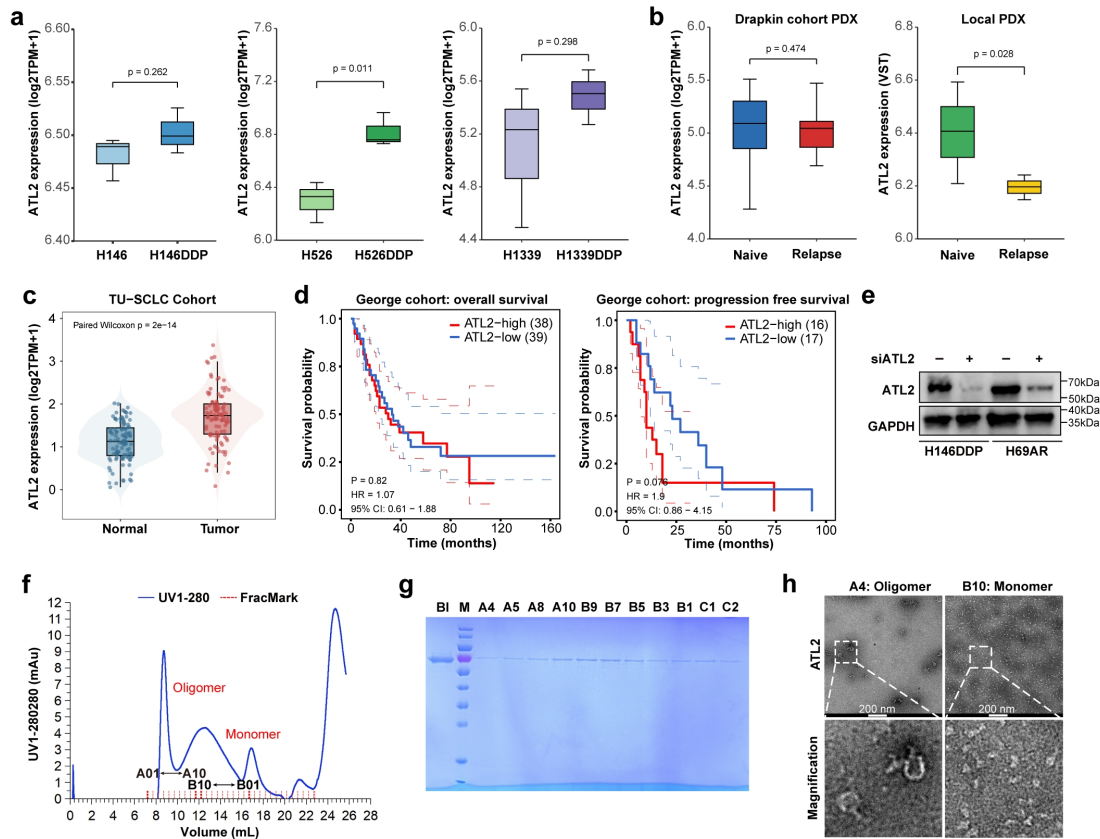

### Extended Data Fig. 5, related to Fig. 6.

**a**, Boxplots showing ATL2 mRNA expression (log2TPM) in chemotherapy-sensitive and chemotherapy-resistant SCLC cell line pairs (H146/H146DDP, H526/H526DDP, and H1339/H1339DDP). **b**, ATL2 expression levels in naive versus relapsed PDX tumours from the Drapkin cohort (left) and the local PDX cohort (right). **c**, Paired ATL2 expression in matched normal lung and tumour tissues from the TU-SCLC cohort (n paired samples = 174). **d**, Kaplan-Meier curves of overall survival (left) and progression-free survival (right) in the George cohort stratified by ATL2 expression. **e**, Immunoblot analysis showing the efficiency of ATL2 knockdown in chemoresistant SCLC cells (H146DDP and H69AR) transfected with siATL2. Representative blots of n = 3 biological replicates. **f**, Size-exclusion chromatography (SEC) profiles of the purified recombinant ATL2 protein showing monomeric and oligomeric peaks (UV absorbance at 280 nm). The fraction index is annotated (FracMark). **g**, SDS-PAGE analysis of sequential SEC fractions corresponding to oligomeric (A4-A10) and monomeric (B1-B10) ATL2 species. BI and M

95 represent the input before SEC and the molecular weight marker, respectively. **h**,  
96 Negative stain transmission electron microscopy images of SEC-purified ATL2 monomeric  
97 and oligomeric fractions (examples: A4, B1, and B10). Scale bars, 50 nm.  
98 Statistical analysis was performed using two-tailed unpaired Student's t test (**a**), unpaired t  
99 test with Welch's correction (**b**), or two-tailed paired Student's t test (**c**).

Extended Data Fig. 6

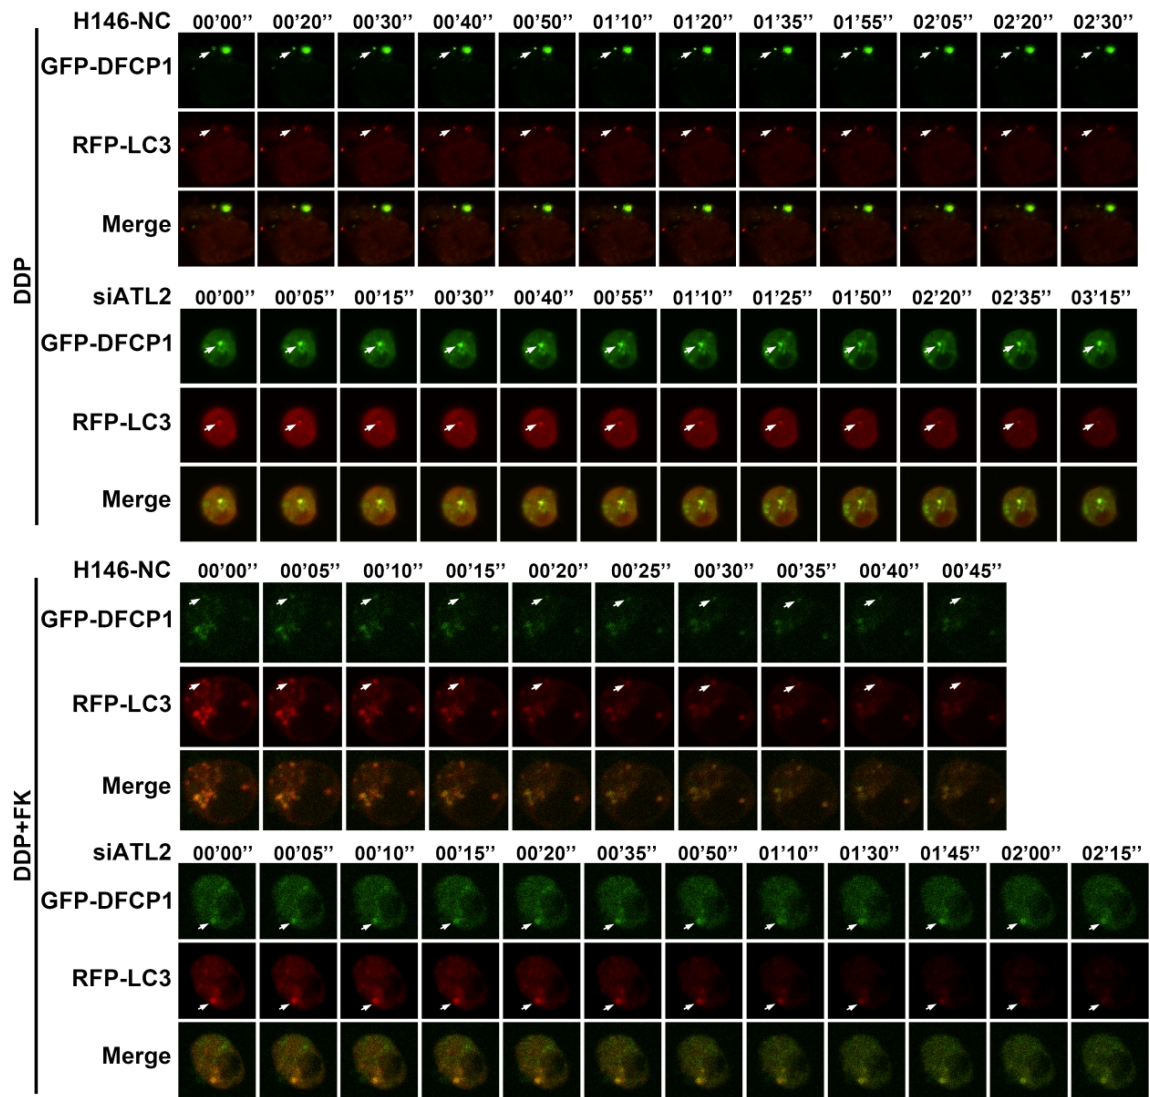

Extended Data Fig. 6, related to Fig. 7.

Time-lapse confocal images of H146 cells coexpressing GFP-DFCP1 and RFP-LC3 after cisplatin (DDP) treatment with or without FK (100  $\mu$ M) in the presence of control siRNA or ATL2-siRNA. White arrowheads indicate LC3 puncta that transiently colocalized with DFCP1-positive ER subdomains. Time stamps denote the interval from LC3 appearance on the ER to its disappearance.

Extended Data Fig. 7

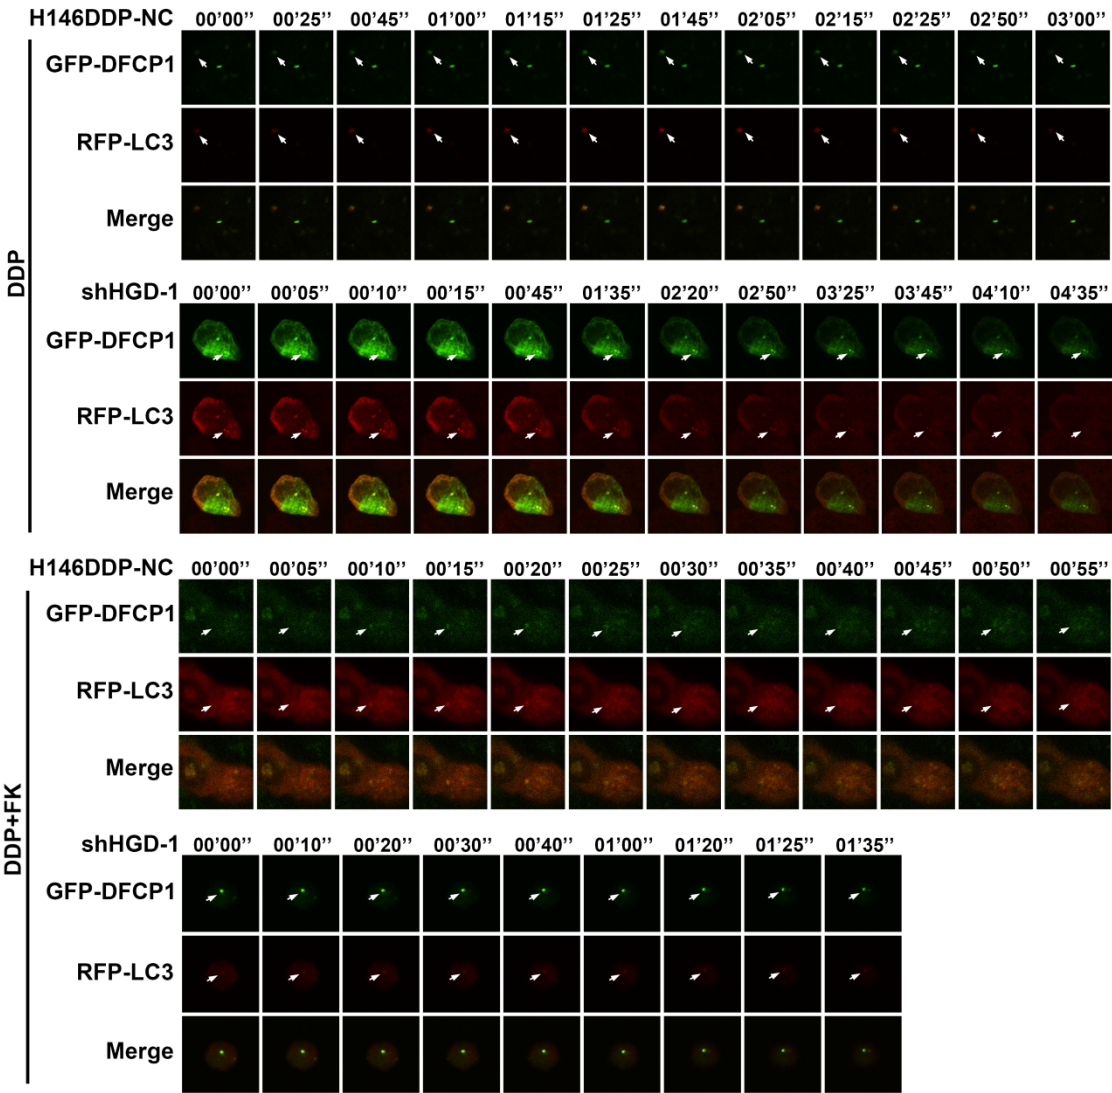

Extended Data Fig. 7, related to Fig. 7.

Time-lapse confocal images of H146DDP cells coexpressing GFP-DFCP1 and RFP-LC3 following treatment with cisplatin (DDP) or DDP/FK with or without HGD knockdown. White arrowheads indicate LC3 puncta that transiently colocalized with DFCP1-positive ER subdomains. Time stamps denote the interval from LC3 appearance on the ER to its disappearance.



## Extended Data Fig. 8

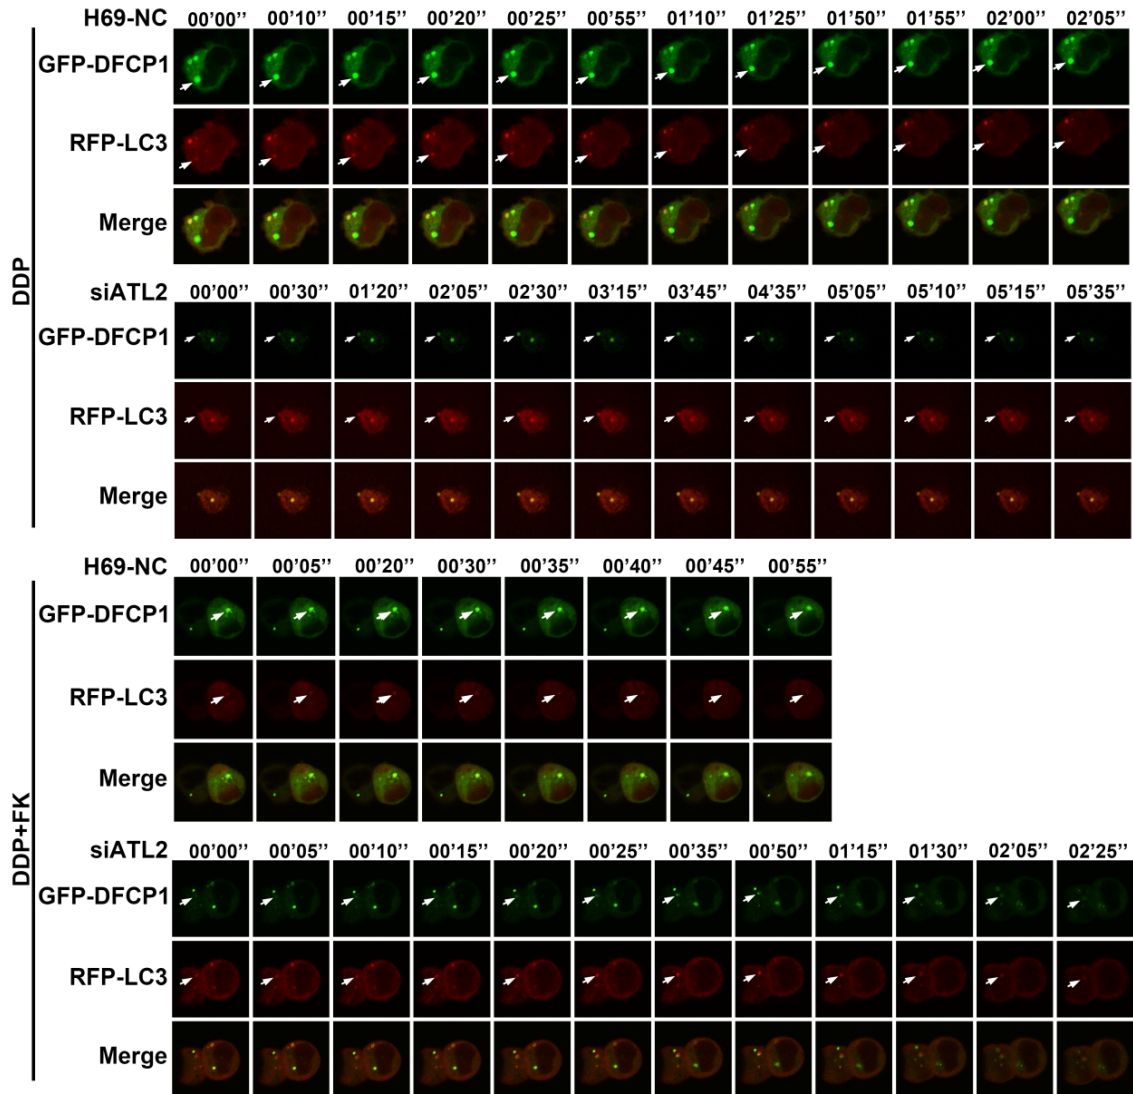

**Extended Data Fig. 8, related to Fig. 7.**

Time-lapse confocal images of H69 cells coexpressing GFP-DFCP1 and RFP-LC3 after cisplatin (DDP) treatment with or without FK (100  $\mu$ M) in the presence of control siRNA or ATL2-siRNA. White arrowheads indicate LC3 puncta that transiently colocalized with DFCP1-positive ER subdomains. Time stamps denote the interval from LC3 appearance on the ER to its disappearance.



# Extended Data Fig. 9

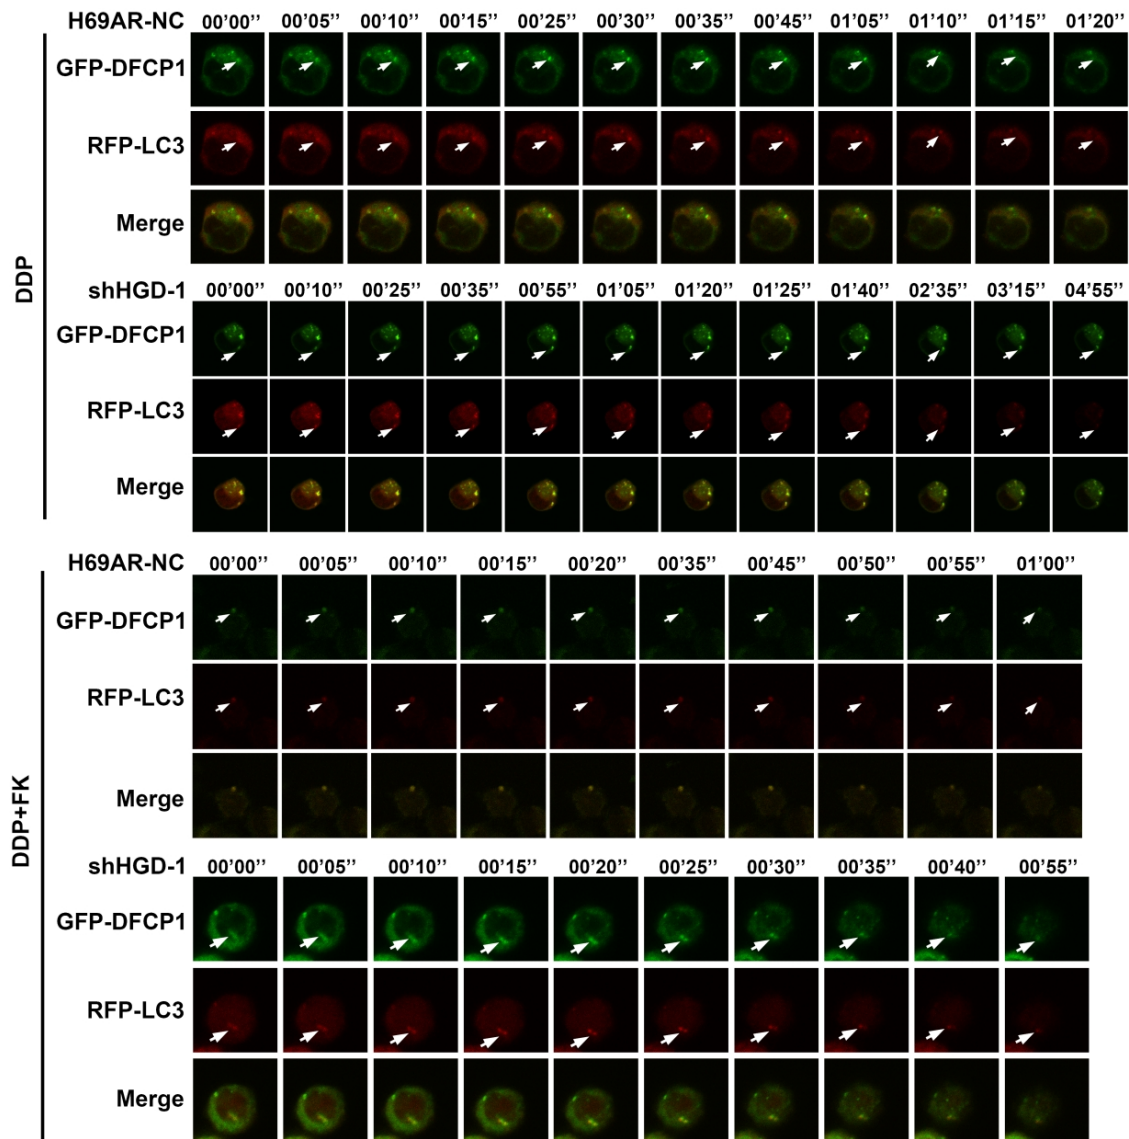

**Extended Data Fig. 9, related to Fig. 7.**

Time-lapse confocal images of H69AR cells coexpressing GFP-DFCP1 and RFP-LC3 following treatment with cisplatin (DDP) or DDP/FK with or without HGD knockdown. White arrowheads indicate LC3 puncta that transiently colocalized with DFCP1-positive ER subdomains. Time stamps denote the interval from LC3 appearance on the ER to its disappearance.
